# Supplementary material for: A Realist Evaluation of Case Management Models for People with Complex Health Conditions Using Novel Methods and Tools—What Works, for Whom, and under What Circumstances?
Source: MDPI journal article supplement (doi:10.3390/ijerph20054362), 2023-02-28
Supplement: s1 [file s1]

Supplementary File S5 Framework and categories for specific variables.

| Variable                                        | Informing framework                                                                                                                                                                                                                                                          | Categories and description                                                                                                                                                                                                                                                                                                                                                                                                                                                                                                                                                                                          |
|-------------------------------------------------|------------------------------------------------------------------------------------------------------------------------------------------------------------------------------------------------------------------------------------------------------------------------------|---------------------------------------------------------------------------------------------------------------------------------------------------------------------------------------------------------------------------------------------------------------------------------------------------------------------------------------------------------------------------------------------------------------------------------------------------------------------------------------------------------------------------------------------------------------------------------------------------------------------|
| Perceived participant adjustment (years 2,5,10) | World Health Organization ICF (environmental factor qualifiers: barriers and facilitators)[1]<br>F1 Mild facilitator<br>F2 Moderator facilitator<br>F3 substantial facilitator<br>F4 complete facilitator<br>Same coding approach and descriptors for barriers B1,B2, B3, B4 | F1-F4<br>B1-B4<br>8 unable to determine (insufficient information)<br>9 not applicable                                                                                                                                                                                                                                                                                                                                                                                                                                                                                                                              |
| Attitude Family year 5 and 10                   |                                                                                                                                                                                                                                                                              |                                                                                                                                                                                                                                                                                                                                                                                                                                                                                                                                                                                                                     |
| Attitude Case manager year 5 and 10             |                                                                                                                                                                                                                                                                              |                                                                                                                                                                                                                                                                                                                                                                                                                                                                                                                                                                                                                     |
| Case management interventions (actions)         | Lukersmith et al (2015) Case Management Taxonomy (CMTaxonomy)[2-4]<br>Interventions – 9 main actions (parent categories) and the holistic assessment and coordination action (child categories)                                                                              | ACTIONS <ul style="list-style-type: none"> <li>Assess 1 (measure outcomes, test and observe action categories)</li> <li>Assess 2 – gather information and listen)</li> <li>Planning – proactively and person centred planning to identify their goals</li> <li>Education</li> <li>Training and skill development</li> <li>Emotional and motivational support</li> <li>Advising</li> <li>Coordinate 1 – navigate, facilitate, advocate, collaborate</li> <li>Coordinate 2 – case consult, maintain feedback, manage documentation</li> <li>Monitoring</li> <li>Related actions (grandchildren categories)</li> </ul> |
| Case management intensity                       | Lukersmith et al (2015) Case Management Taxonomy (CMTaxonomy)[2, 3]<br>Service tree (inputs) intensity classification                                                                                                                                                        | 1. Low intensity < 3 times per month per participant<br>2. Medium 1-3 times per week, per participant<br>3. High intensity (> 3 times per week with the participant)                                                                                                                                                                                                                                                                                                                                                                                                                                                |
| Phase post injury                               | My Plan Phases post injury [5]                                                                                                                                                                                                                                               | 1. Continuing my recovery (adjusting to & settling into living at home, doing activities<br>2. My participation (participating in my chosen activities and major life areas - education, work, community, social life)<br>3. Maintaining my way of life (living life, maintaining my health and wellbeing)                                                                                                                                                                                                                                                                                                          |
| Goal target concept                             | World Health Organization ICF (environmental factor qualifiers: barriers and facilitators)[1]                                                                                                                                                                                | Goal concept mapped to the ICF using the ICF browser and the 2 level ICF code. (if not possible because poor goal description then one level code used).<br>The ICF Linking rules were applied [6]                                                                                                                                                                                                                                                                                                                                                                                                                  |
| Goal and step rating                            | Community Living Plan (CLP) or My Plan Goal rating [5]                                                                                                                                                                                                                       | 1. Not achieved<br>2. Partially achieved<br>3. Achieved<br>4. W withdrawn or did not proceed                                                                                                                                                                                                                                                                                                                                                                                                                                                                                                                        |

1. World Health Organization (WHO). *International classification of functioning, disability and health*. 2001; Available from: <https://apps.who.int/iris/handle/10665/42407>.
2. Lukersmith, S., et al., *The brain injury case management taxonomy (BICM-T); a classification of community-based case management interventions for a common language*. Disability and Health Journal, 2015. **9**(2): p. 272-80.
3. Lukersmith, S., : *A Taxonomy of Case Management Development, Dissemination, and Impact*. , in *Faculty of Health Sciences*. 2017, University of Sydney: The Sydney eScholarship Repository, Post graduate theses/Sydney Digital Theses (Open Access).
4. WHO ICHI Development Project. *International Classification of Health Interventions (ICHI) Alpha 2 version* 2013; Available from: <http://sydney.edu.au/health-sciences/ncch/about.shtml>.
5. Lukersmith, S., et al., *My Plan – a new meso to micro level building block to promote person-centred care planning*. Int J Integr Care, 2017. **17**(5): p. A60.
6. Cieza, A., et al., *Refinements of the ICF Linking Rules to strengthen their potential for establishing comparability of health information*. Disability and Rehabilitation, 2016.
