# Supplementary material for: A Realist Evaluation of Case Management Models for People with Complex Health Conditions Using Novel Methods and Tools—What Works, for Whom, and under What Circumstances?
Source: Int J Environ Res Public Health. 2023 Feb 28;20(5):4362. doi: 10.3390/ijerph20054362 (PMC10002263; doi:10.3390/ijerph20054362)
Supplement: Supplementary file 1 [file ijerph-20-04362-s001.zip]

Archive with 5 entries (5 files):
- File S1 Data extracted .pdf
- File S2 CMTaxonomy Intervention tree.pdf
- File S3 CMTaxonomy Service tree.pdf
- File S4 CMTaxonomy  glossary.pdf
- File S5 Framework and categories.pdf
