# Supplementary figures and images for: A Realist Evaluation of Case Management Models for People with Complex Health Conditions Using Novel Methods and Tools—What Works, for Whom, and under What Circumstances?
Source: MDPI journal article supplement (doi:10.3390/ijerph20054362), 2023-02-28

## Intervention tree (throughputs) of the community-based case management taxonomy

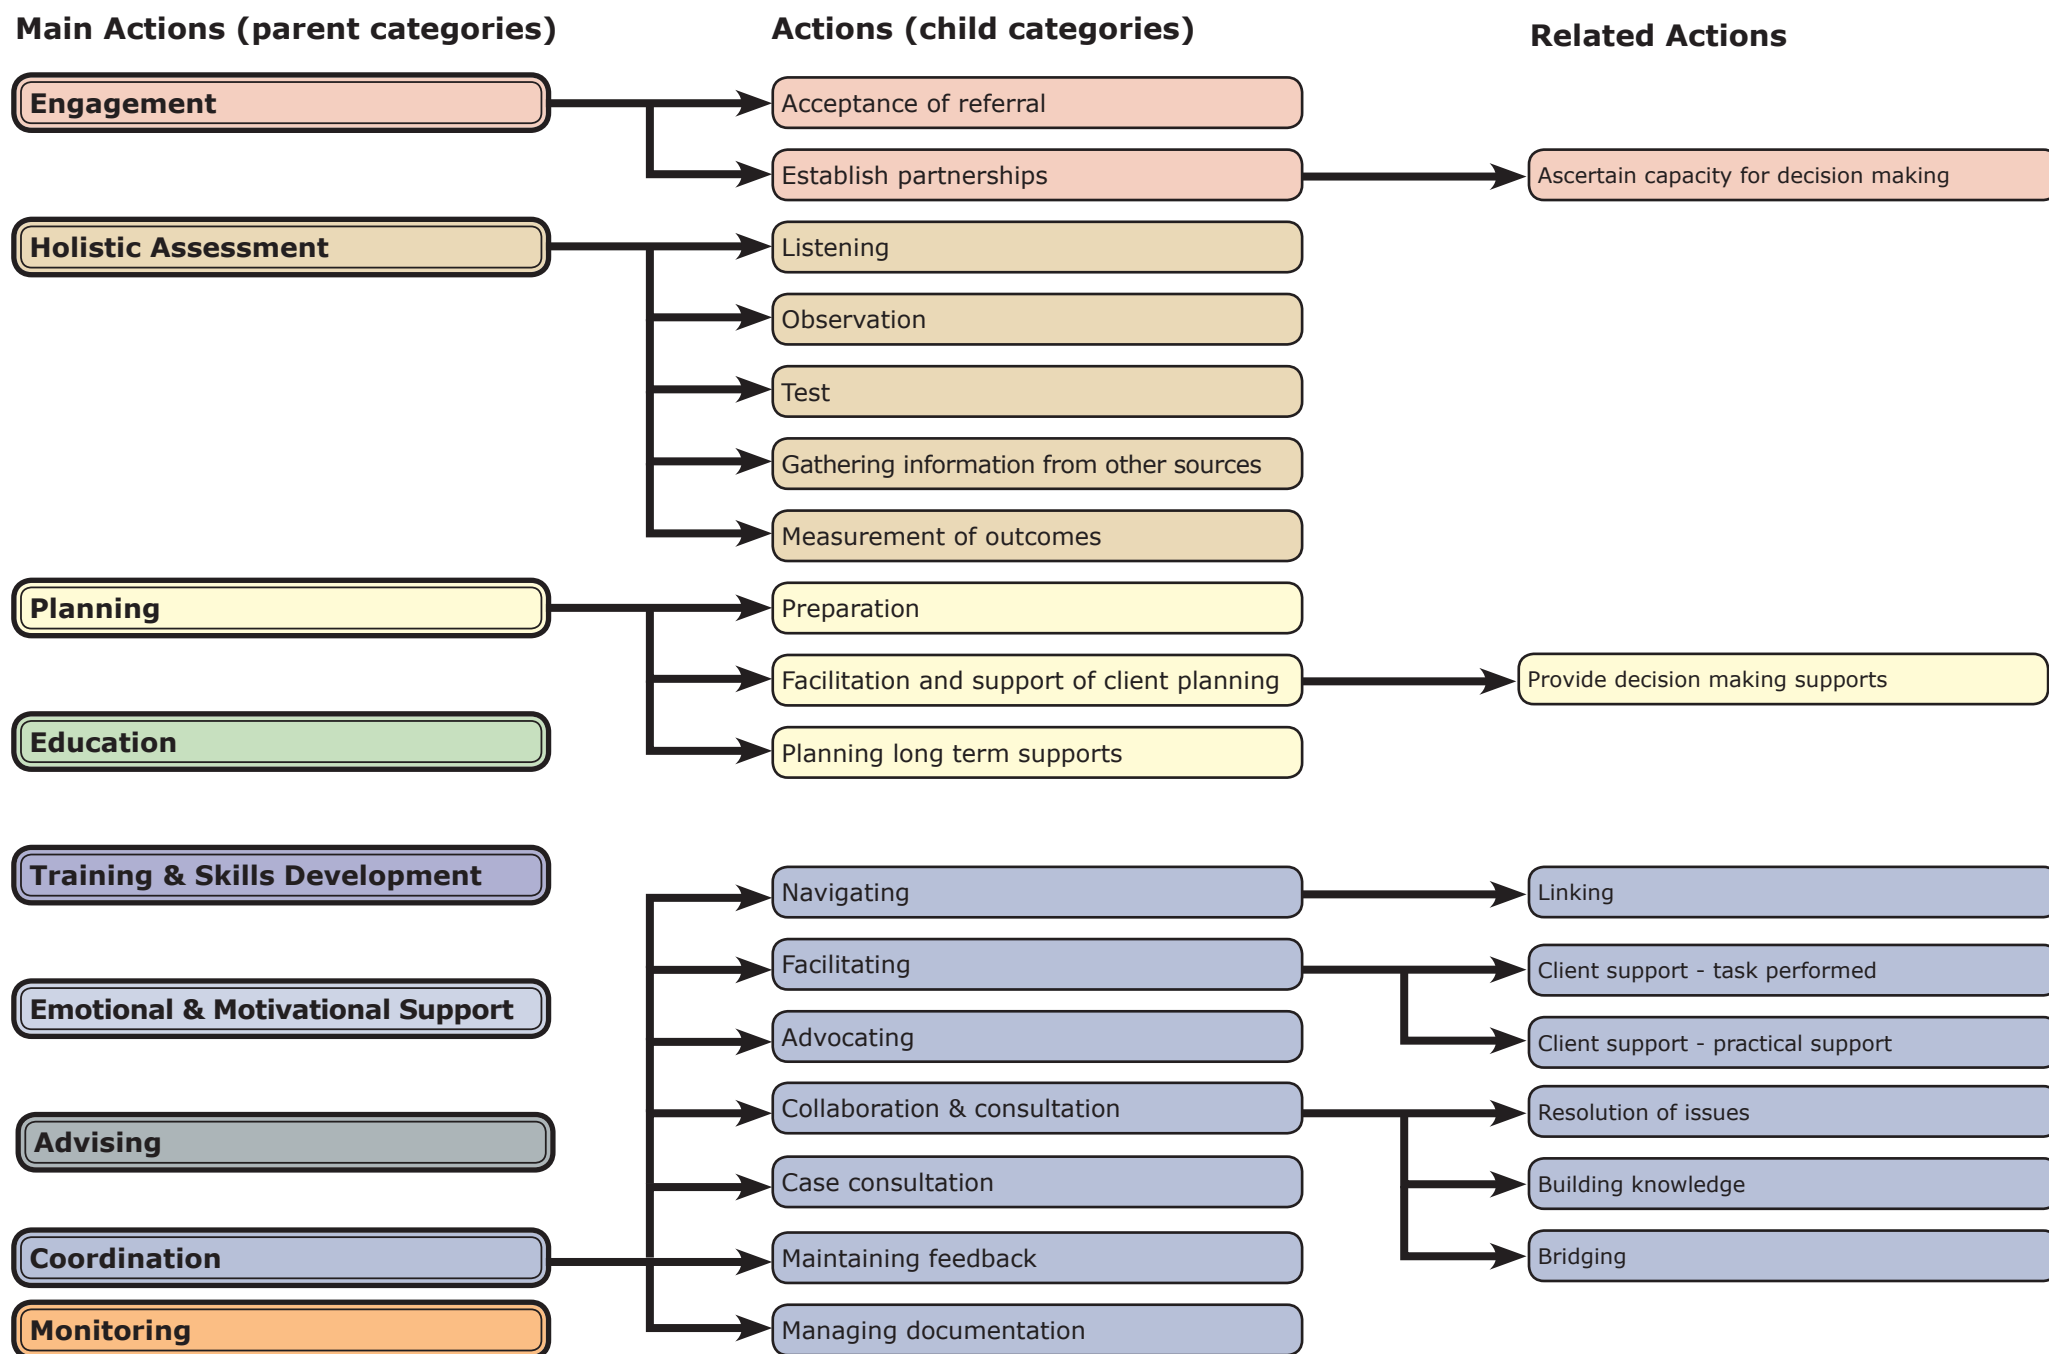

Supplement: s1 [file s1]

## Service tree (inputs) of the community-based case management taxonomy

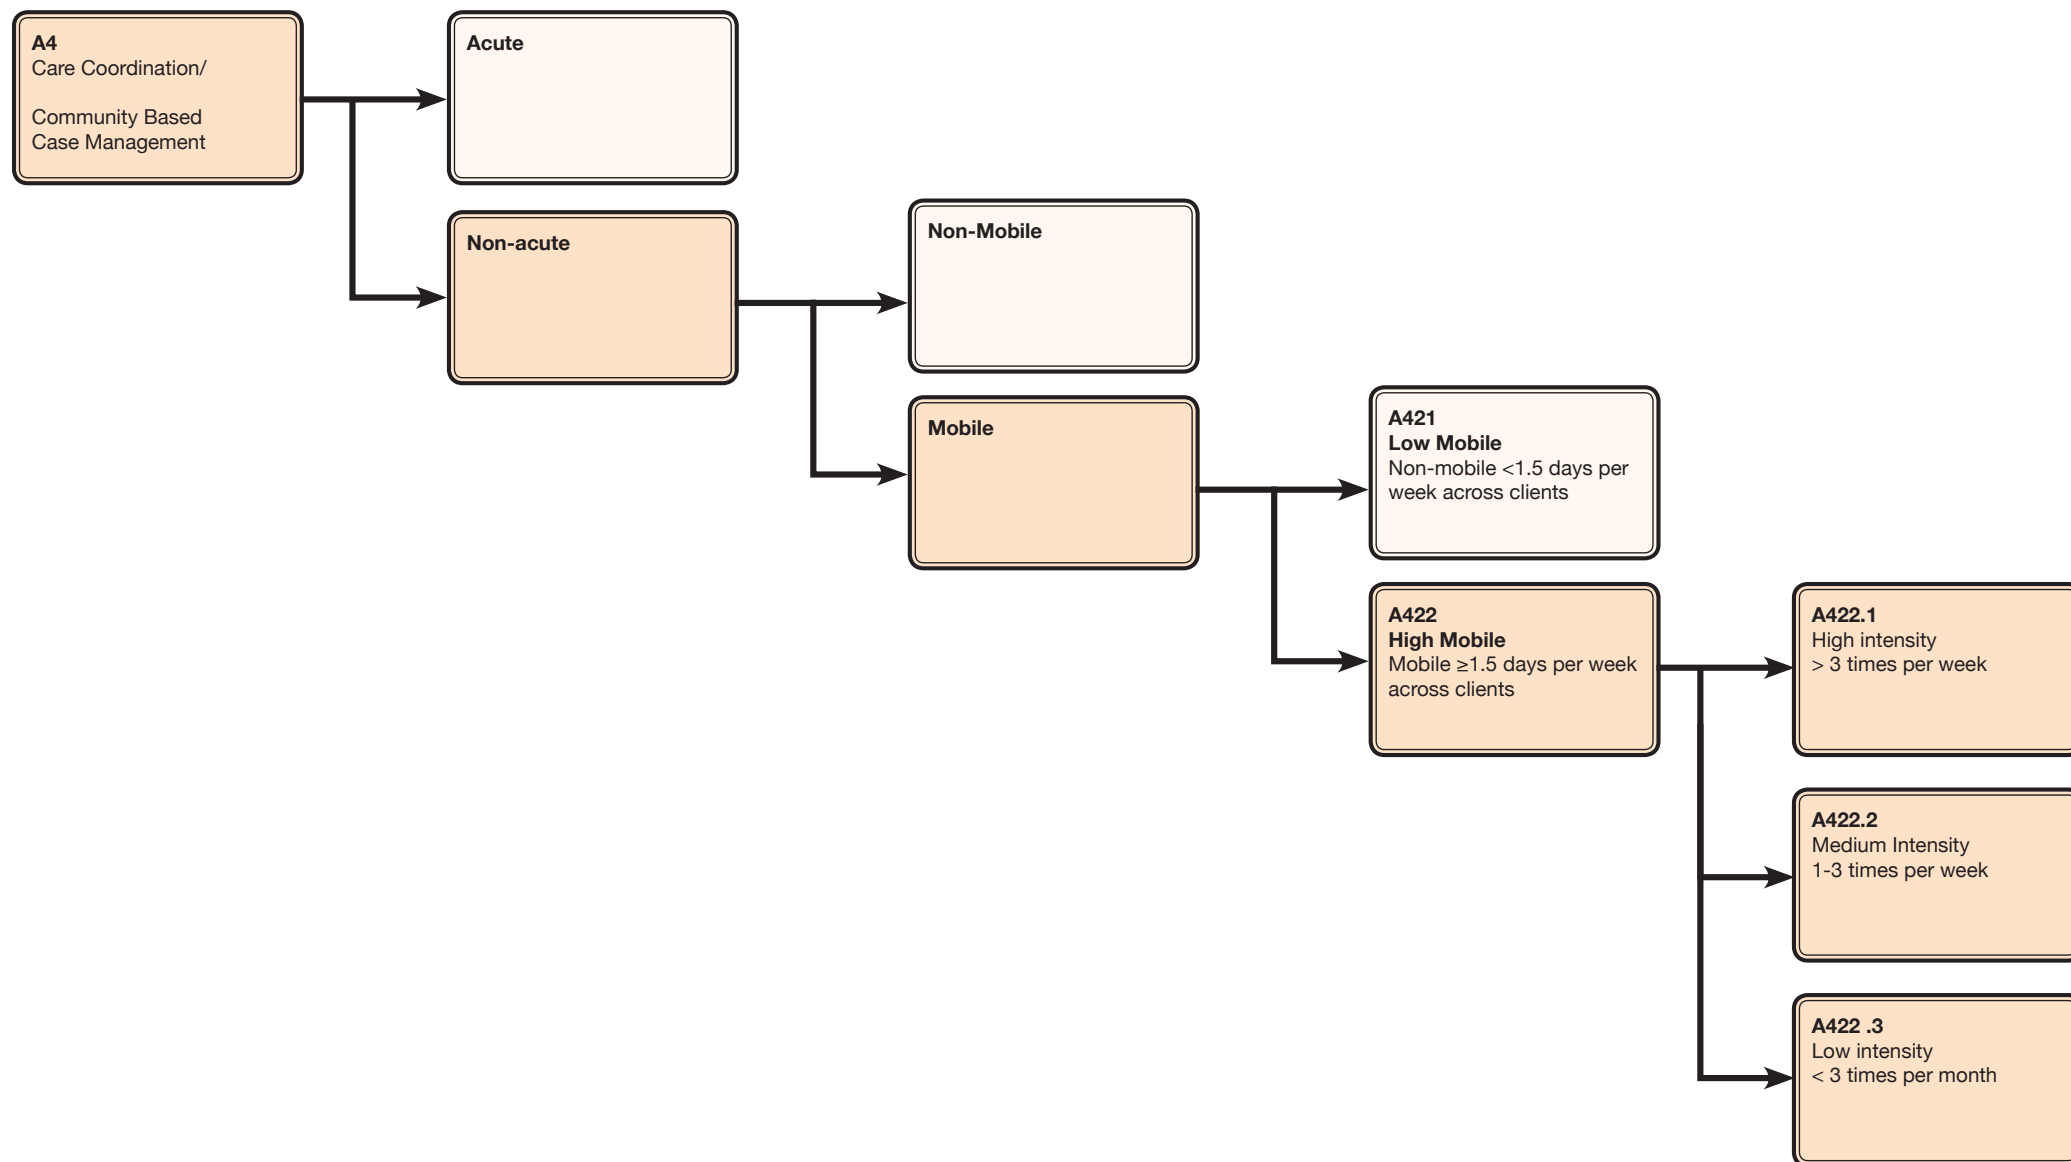

Supplement: s1 [file s1]
